# Supplementary material
Source: Research Square preprint supplement (doi:10.21203/rs.3.rs-9295796/v1)
Supplement: Supplementary file 1 [file 1ed5a03de60bc3401ce5b080.xlsx]

## Sheet: Antimicrobial Analysis
Organism	Sample	Trial 1	Trial 2	Trial 3	Mean	SD
S. aureus	MLE	13.25	14	14.75	14	0.75
S. aureus	Ofloxacin	12.17	13.83	13	13	0.83
P. aeruginosa	MLE	14.32	15.68	15	15	0.68
P. aeruginosa	Ciprofloxacin	23	22.29	23.71	23	0.71
C. albicans	MLE	18	17.54	18.46	18	0.46
C. albicans	Nystatin	16.63	17	17.37	17	0.37
