# Supplementary material
Source: Research Square preprint supplement (doi:10.21203/rs.3.rs-9295796/v1)
Supplement: Supplementary file 2 [file bce26da14a7d7fc5ad08ecbe.xlsx]

## Sheet: Release Analysis
Time (h)	Formulation	Abs1	Abs2	Abs3	Mean Abs	SD Abs	Conc1	Conc2	Conc3	Mean Conc	%Release
1	F1	0.8849	0.8869	0.8889	0.8869	0.002	90.59	90.79	90.99	90.79	90.79
2	F1	0.947	0.949	0.951	0.949	0.002	96.68	96.88	97.08	96.88	96.88
3	F1	0.9549	0.9569	0.9589	0.9569	0.002	97.46	97.66	97.86	97.66	97.66
4	F1	0.9678	0.9698	0.9718	0.9698	0.002	98.72	98.92	99.12	98.92	98.92
6	F1	0.9684	0.9704	0.9724	0.9704	0.002	98.78	98.98	99.18	98.98	98.98
8	F1	0.9718	0.9738	0.9758	0.9738	0.002	99.11	99.31	99.51	99.31	99.31
1	F2	0.9431	0.9451	0.9471	0.9451	0.002	96.3	96.5	96.7	96.5	96.5
2	F2	0.9978	0.9998	1.0018	0.9998	0.002	101.66	101.86	102.06	101.86	101.86
3	F2	0.982	0.984	0.986	0.984	0.002	100.11	100.31	100.51	100.31	100.31
4	F2	0.9772	0.9792	0.9812	0.9792	0.002	99.64	99.84	100.04	99.84	99.84
6	F2	0.9708	0.9728	0.9748	0.9728	0.002	99.02	99.22	99.42	99.22	99.22
8	F2	0.9723	0.9743	0.9763	0.9743	0.002	99.16	99.36	99.56	99.36	99.36
1	F3	0.9878	0.9898	0.9918	0.9898	0.002	100.68	100.88	101.08	100.88	100.88
2	F3	1.0007	1.0027	1.0047	1.0027	0.002	101.95	102.15	102.35	102.15	102.15
3	F3	0.9884	0.9904	0.9924	0.9904	0.002	100.74	100.94	101.14	100.94	100.94
4	F3	0.9809	0.9829	0.9849	0.9829	0.002	100.01	100.21	100.41	100.21	100.21
6	F3	0.9737	0.9757	0.9777	0.9757	0.002	99.3	99.5	99.7	99.5	99.5
8	F3	0.9728	0.9748	0.9768	0.9748	0.002	99.21	99.41	99.61	99.41	99.41
