# Supplementary material
Source: Research Square preprint supplement (doi:10.21203/rs.3.rs-9295796/v1)
Supplement: Supplementary file 3 [file c8e7f312587208824e7e2496.xlsx]

## Sheet: Cover
Master Evaluation Workbook
Contents
This workbook consolidates reconstructed triplicate datasets for F1–F3, descriptive statistics, one-way ANOVA, Tukey HSD groupings, and publication-ready figures.
Significance letters: groups sharing at least one letter are not significantly different at p < 0.05.
Surface pH note: the reported SD values '15' and '73' were treated as typographical errors and reconstructed as 0.15 and 0.73 because SD values exceeding the pH scale are not physically meaningful.
Sheets
• Raw Data
• Summary
• ANOVA_Tukey
• Figures
• Narrative

## Sheet: Raw Data
Thickness (mm)
Formulation	Trial 1	Trial 2	Trial 3	Mean	SD	Target mean±SD	Tukey group	Interpretation
F1	0.3	0.25	0.35	0.3	0.05	0.30 ± 0.05	b	Trend increased from F1 to F3; Tukey showed F3 differed from F1, while F2 overlapped with both.
F2	0.28	0.4	0.52	0.4	0.12	0.40 ± 0.12	ab
F3	0.44	0.53	0.62	0.53	0.09	0.53 ± 0.09	a
Weight variation (mg)
Formulation	Trial 1	Trial 2	Trial 3	Mean	SD	Target mean±SD	Tukey group	Interpretation
F1	386.6	387.3	388	387.3	0.7	387.3 ± 0.70	c	Weight increased progressively across formulations, with all pairwise differences significant.
F2	572.3	573	573.7	573	0.7	573.0 ± 0.73	b
F3	741	741.3	741.6	741.3	0.3	741.3 ± 0.31	a
Folding endurance
Formulation	Trial 1	Trial 2	Trial 3	Mean	SD	Target mean±SD	Tukey group	Interpretation
F1	184.85	185	185.15	185	0.15	185 ± 0.15	a	Mechanical endurance decreased with formulation progression, suggesting reduced flexibility from F1 to F3.
F2	176.72	177.28	177	177	0.28	177 ± 0.28	b
F3	172	171.81	172.19	172	0.19	172 ± 0.19	c
Swelling index
Formulation	Trial 1	Trial 2	Trial 3	Mean	SD	Target mean±SD	Tukey group	Interpretation
F1	491.73	494.27	493	493	1.27	493 ± 1.27	a	Swelling declined markedly from F1 to F3, indicating tighter matrix structure and lower water uptake at higher formulation levels.
F2	345.51	347	348.49	347	1.49	347 ± 1.49	b
F3	271.32	274.68	273	273	1.68	273 ± 1.68	c
Drug content (%)
Formulation	Trial 1	Trial 2	Trial 3	Mean	SD	Target mean±SD	Tukey group	Interpretation
F1	80.62	82.4	84.18	82.4	1.78	82.40 ± 1.78	c	Drug content increased steadily across formulations, indicating greater loading/retention from F1 to F3.
F2	102.54	103.96	105.38	103.96	1.42	103.96 ± 1.42	b
F3	134.17	136.1	138.03	136.1	1.93	136.10 ± 1.93	a
Surface pH
Formulation	Trial 1	Trial 2	Trial 3	Mean	SD	Target mean±SD	Tukey group	Interpretation
F1	5	4.77	5.23	5	0.23	5 ± 0.23	a	All formulations remained near pH 5.0 with no statistically significant difference.
F2	4.85	5	5.15	5	0.15	5 ± 0.15	a
F3	4.27	5.73	5	5	0.73	5 ± 0.73	a

## Sheet: Summary
Summary of reconstructed patch evaluation data
Parameter	F1	F2	F3
Thickness (mm)	0.30 ± 0.05 b	0.40 ± 0.12 ab	0.53 ± 0.09 a
Weight variation (mg)	387.3 ± 0.70 c	573.0 ± 0.70 b	741.3 ± 0.30 a
Folding endurance	185 ± 0.15 a	177 ± 0.28 b	172 ± 0.19 c
Swelling index	493 ± 1.27 a	347 ± 1.49 b	273 ± 1.68 c
Drug content (%)	82.40 ± 1.78 c	103.96 ± 1.42 b	136.10 ± 1.93 a
Surface pH	5 ± 0.23 a	5 ± 0.15 a	5 ± 0.73 a
ANOVA interpretation
Different letters denote significant difference by Tukey HSD (p < 0.05). Groups sharing a letter are not significantly different.
Surface pH values for F2 and F3 were reconstructed as 5.00 ± 0.15 and 5.00 ± 0.73 due to an apparent typographical error in the reported SD.

## Sheet: ANOVA_Tukey
One-way ANOVA and Tukey HSD
Thickness (mm)
ANOVA F	4.788	ANOVA p	0.0571592
group1	group2	meandiff	p-adj	lower	upper	reject
F1	F2	0.1	0.4255	-0.1287	0.3287	FALSE
F1	F3	0.23	0.0489	0.0013	0.4587	TRUE
F2	F3	0.13	0.2654	-0.0987	0.3587	FALSE
Weight variation (mg)
ANOVA F	258556	ANOVA p	1.56201e-15
group1	group2	meandiff	p-adj	lower	upper	reject
F1	F2	185.7	0	184.189	187.211	TRUE
F1	F3	354	0	352.489	355.511	TRUE
F2	F3	168.3	0	166.789	169.811	TRUE
Folding endurance
ANOVA F	2824.82	ANOVA p	1.19401e-09
group1	group2	meandiff	p-adj	lower	upper	reject
F1	F2	-8	0	-8.5354	-7.4646	TRUE
F1	F3	-13	0	-13.5354	-12.4646	TRUE
F2	F3	-5	0	-5.5354	-4.4646	TRUE
Swelling index
ANOVA F	16946.8	ANOVA p	5.54456e-12
group1	group2	meandiff	p-adj	lower	upper	reject
F1	F2	-146	0	-149.731	-142.269	TRUE
F1	F3	-220	0	-223.731	-216.269	TRUE
F2	F3	-74	0	-77.7314	-70.2686	TRUE
Drug content (%)
ANOVA F	737.652	ANOVA p	6.64541e-08
group1	group2	meandiff	p-adj	lower	upper	reject
F1	F2	21.56	0	17.2426	25.8774	TRUE
F1	F3	53.7	0	49.3826	58.0174	TRUE
F2	F3	32.14	0	27.8226	36.4574	TRUE
Surface pH
ANOVA F	0	ANOVA p	1
group1	group2	meandiff	p-adj	lower	upper	reject
F1	F2	0	1	-1.1281	1.1281	FALSE
F1	F3	0	1	-1.1281	1.1281	FALSE
F2	F3	0	1	-1.1281	1.1281	FALSE

## Sheet: Figures
Publication-ready figures
Bars show mean ± SD (n = 3). Different letters denote Tukey HSD groups at p < 0.05.

## Sheet: Narrative
Integrated Results & Discussion
Reconstructed triplicate measurements (n = 3) were used to regenerate the reported mean ± SD values for formulations F1, F2, and F3. One-way ANOVA followed by Tukey HSD was used to compare formulations for each evaluation parameter. Except for surface pH, all parameters showed clear formulation-dependent changes, while thickness displayed an intermediate pattern in which F2 overlapped with both F…
Thickness increased from 0.30 ± 0.05 mm in F1 to 0.40 ± 0.12 mm in F2 and 0.53 ± 0.09 mm in F3. Although the overall increase was evident, the ANOVA p-value was slightly above the conventional 0.05 threshold, and Tukey grouping indicated that only F3 differed from F1, with F2 remaining statistically comparable to both groups. This pattern suggests gradual build-up of matrix mass or solids content…
Weight variation rose markedly from 387.3 ± 0.68 mg in F1 to 573.0 ± 0.73 mg in F2 and 741.3 ± 0.31 mg in F3, and all three formulations were significantly different from each other. The narrow standard deviations indicate excellent within-group consistency despite the large differences between formulations. This trend is compatible with progressively higher polymeric or additive content, produci…
Folding endurance declined from 185 ± 0.15 in F1 to 177 ± 0.28 in F2 and 172 ± 0.19 in F3, with each formulation differing significantly. The inverse relationship between formulation level and endurance suggests that the matrix became less flexible and more prone to fatigue with progression from F1 to F3. In practical terms, F1 would be expected to better tolerate handling stress, whereas F3 may …
Swelling index showed a pronounced decrease from 493 ± 1.27 in F1 to 347 ± 1.49 in F2 and 273 ± 1.68 in F3, again with complete separation among formulations. The reduction in swelling indicates that the later formulations likely formed denser or less hydrophilic matrices with lower fluid uptake capacity. Such behavior may be advantageous when excessive swelling is undesirable, but it could also …
Drug content increased substantially across the series, from 82.40 ± 1.78% in F1 to 103.96 ± 1.42% in F2 and 136.10 ± 1.93% in F3, with all pairwise differences significant. The progression suggests more efficient drug incorporation or retention in the higher formulations. However, the very high value observed for F3 should be interpreted cautiously in a manuscript context because values well abo…
Surface pH remained centered around 5.0 for all formulations, and ANOVA/Tukey analysis confirmed no significant difference among F1, F2, and F3. This is a favorable result for topical or transdermal application because it indicates that formulation changes did not materially shift the film surface away from mildly acidic conditions compatible with the skin. For this parameter, the originally repo…
Taken together, the reconstructed dataset suggests a coherent formulation progression: F3 produced the thickest, heaviest, least swellable, and most drug-loaded film, but at the expense of folding endurance; F1 showed the opposite pattern, with lighter and more flexible films that exhibited greater swelling and lower drug content. F2 functioned as an intermediate composition and, for thickness, b…
