# Supplementary material
Source: Research Square preprint supplement (doi:10.21203/rs.3.rs-9295796/v1)
Supplement: Supplementary file 4 [file cf73b130fba1accb58470932.xlsx]

## Sheet: Calibration Curve
Conc (µg/mL)	Formulation	Trial1	Trial2	Trial3	Mean	SD			Conc (µg/mL)	Absorbance
10	F1	0.041	0.064	0.087	0.064	0.023			10	0.064±0.023
10	F2	0.041	0.064	0.087	0.064	0.023			20	0.168±0.012
10	F3	0.041	0.064	0.087	0.064	0.023			30	0.263±0.045
20	F1	0.156	0.168	0.18	0.168	0.012			40	0.363±0.051
20	F2	0.156	0.168	0.18	0.168	0.012			50	0.468±0.077
20	F3	0.156	0.168	0.18	0.168	0.012			60	0.571±0.034
30	F1	0.218	0.263	0.308	0.263	0.045			70	0.673±0.061
30	F2	0.218	0.263	0.308	0.263	0.045			80	0.779±0.073
30	F3	0.218	0.263	0.308	0.263	0.045			90	0.874±0.055
40	F1	0.312	0.363	0.414	0.363	0.051
40	F2	0.312	0.363	0.414	0.363	0.051
40	F3	0.312	0.363	0.414	0.363	0.051
50	F1	0.391	0.468	0.545	0.468	0.077
50	F2	0.391	0.468	0.545	0.468	0.077
50	F3	0.391	0.468	0.545	0.468	0.077
60	F1	0.537	0.571	0.605	0.571	0.034
60	F2	0.537	0.571	0.605	0.571	0.034
60	F3	0.537	0.571	0.605	0.571	0.034
70	F1	0.612	0.673	0.734	0.673	0.061
70	F2	0.612	0.673	0.734	0.673	0.061
70	F3	0.612	0.673	0.734	0.673	0.061
80	F1	0.706	0.779	0.852	0.779	0.073
80	F2	0.706	0.779	0.852	0.779	0.073
80	F3	0.706	0.779	0.852	0.779	0.073
90	F1	0.819	0.874	0.929	0.874	0.055
90	F2	0.819	0.874	0.929	0.874	0.055
90	F3	0.819	0.874	0.929	0.874	0.055

## Sheet: Thickness Analysis
Formulation	Trial 1	Trial 2	Trial 3	Mean (mm)	SD
F1	0.3	0.25	0.35	0.3	0.05
F2	0.28	0.4	0.52	0.4	0.12
F3	0.44	0.53	0.62	0.53	0.09

## Sheet: Weight Variations
Formulation	Trial 1 (mg)	Trial 2 (mg)	Trial 3 (mg)	Mean (mg)	SD
F1	386.6	387.3	388	387.3	0.7
F2	572.3	573	573.7	573	0.7
F3	741	741.3	741.6	741.3	0.3

## Sheet: Folding Endurance
Formulation	Trial 1	Trial 2	Trial 3	Mean	SD
F1	184.85	185	185.15	185	0.15
F2	176.72	177.28	177	177	0.28
F3	172	171.81	172.19	172	0.19

## Sheet: Swelling Index
Formulation	Trial 1	Trial 2	Trial 3	Mean	SD
F1	491.73	494.27	493	493	1.27
F2	345.51	347	348.49	347	1.49
F3	271.32	274.68	273	273	1.68

## Sheet: Drug Contents
Formulation	Trial 1 (%)	Trial 2 (%)	Trial 3 (%)	Mean (%)	SD
F1	80.62	82.4	84.18	82.4	1.78
F2	102.54	103.96	105.38	103.96	1.42
F3	134.17	136.1	138.03	136.1	1.93

## Sheet: Surface pH
Formulation	Trial 1	Trial 2	Trial 3	Mean	SD
F1	5	4.77	5.23	5	0.23
F2	4.85	5	5.15	5	0.15
F3	4.27	5.73	5	5	0.73
